# Supplementary material for: Eosinopenia in COVID-19 Patients: A Retrospective Analysis
Source: PubMed Central journal article supplement (PMC7762070; doi:10.3390/microorganisms8121929), 2020-12-04
Supplement: microorganisms-08-01929-s001.pdf [file microorganisms-08-01929-s001.pdf]

**Table S1.** Diagnosis of patients with rRT-PCR test negative.

| Diagnosis                                               | n = 80  |
|---------------------------------------------------------|---------|
| Others pulmonary infections, n (%)                      | 12 (15) |
| COPD/Asthma, n (%)                                      | 13 (16) |
| Pulmonary Embolism, n (%)                               | 2 (2)   |
| Acute Cardiac Disease, n (%)                            | 11 (14) |
| Acute Neurologic Disease, n (%)                         | 3 (4)   |
| Cancer, n (%)                                           | 8 (10)  |
| Others not pulmonary infections, n (%)                  | 7 (9)   |
| Others minor diagnosis (i.e. Anxiety, Psychosis), n (%) | 24 (30) |

COPD = Chronic obstructive pulmonary disease

**Table S2.** Area under the ROC curve (AUROC) for subtypes of white blood cells on admission to predict positive rRT-PCR.

|                                  | AUROC | C.I. 95%  | p-value |
|----------------------------------|-------|-----------|---------|
| White Blood Cells                | 0.77  | 0.70–0.84 | < 0.01  |
| <i>Neutrophils</i>               | 0.70  | 0.62–0.78 | < 0.01  |
| <i>Lymphocytes</i>               | 0.67  | 0.60–0.76 | < 0.01  |
| <i>Monocytes</i>                 | 0.73  | 0.65–0.80 | < 0.01  |
| <i>Eosinophils</i>               | 0.84  | 0.78–0.90 | < 0.01  |
| <i>Basophils</i>                 | 0.81  | 0.74–0.88 | < 0.01  |
| Neutrophils to Lymphocytes ratio | 0.51  | 0.43–0.60 | 0.76    |
| Lymphocytes to CRP ratio         | 0.72  | 0.64–0.79 | < 0.01  |

CRP = C-Reactive Protein; 95% CI = Confidence Interval 95%.

**Table S3.** Number of patients with different levels of eosinopenia, according to presence of anosmia.

|                                           | Anosmia (n = 11) | Not Anosmia (n = 163) | p-value |
|-------------------------------------------|------------------|-----------------------|---------|
| Eosinophils < 100/mm <sup>3</sup> , n (%) | 11 (100)         | 123 (76)              | 0.07    |
| Eosinophils < 45/mm <sup>3</sup> , n (%)  | 11 (100)         | 107 (66)              | 0.01    |
| Eosinophils < 5/mm <sup>3</sup> , n (%)   | 7 (64)           | 59 (36)               | 0.11    |

**Table S4.** Area under the ROC curve (AUROC) for subtypes of white blood cells on admission to predict suspected chest CT-scan findings.

|                                  | AUROC | C.I. 95%  | p value |
|----------------------------------|-------|-----------|---------|
| White Blood Cells                | 0.70  | 0.60–0.80 | < 0.01  |
| <i>Neutrophils</i>               | 0.65  | 0.55–0.76 | < 0.01  |
| <i>Lymphocytes</i>               | 0.60  | 0.49–0.71 | 0.07    |
| <i>Monocytes</i>                 | 0.71  | 0.6–0.80  | < 0.01  |
| <i>Eosinophils</i>               | 0.84  | 0.77–0.91 | < 0.01  |
| <i>Basophils</i>                 | 0.84  | 0.77–0.91 | < 0.01  |
| Neutrophils to Lymphocytes ratio | 0.51  | 0.40–0.62 | 0.91    |
| Lymphocytes to CRP ratio         | 0.71  | 0.61–0.81 | < 0.01  |

CRP = C-Reactive Protein; 95% CI = Confidence Interval 95%.
